# Supplementary material for: Genomics and Prognosis Analysis of N6-Methyladenosine Regulators in Lung Adenocarcinoma
Source: Front Genet. 2021 Dec 9;12:746666. doi: 10.3389/fgene.2021.746666 (PMC8697852; doi:10.3389/fgene.2021.746666)
Supplement: Supplementary file 1 [file Table2.XLSX]

## Sheet: Sheet1
ID	logFC	AveExpr	t	P.Value	adj.P.Val	B
SCGB3A2	-3.11442	7.44577	-11.4389	4.44491e-27	8.24366e-25	50.6729
PGC	-2.87676	5.9695	-8.53821	1.64215e-16	8.3118e-15	26.6803
SFTPB	-2.80918	10.8996	-11.9183	5.28825e-29	1.15981e-26	55.0525
SFTPA1	-2.7011	9.17195	-9.24305	6.86172e-19	4.84334e-17	32.0699
C16orf89	-2.62596	6.64533	-12.9699	2.27244e-33	6.90801e-31	64.9963
SFTPA2	-2.57847	9.60849	-8.95042	6.92129e-18	4.32233e-16	29.7947
NAPSA	-2.42584	8.94917	-11.563	1.42541e-27	2.7936e-25	51.7967
SCGB3A1	-2.42584	6.73207	-8.60862	9.63311e-17	5.08018e-15	27.2047
SFTPC	-2.40879	7.54113	-6.56996	1.26416e-10	2.56678e-09	13.4034
CYP4B1	-2.24017	5.0779	-11.0008	2.32906e-25	3.57562e-23	46.7621
SFTPD	-2.16245	7.00952	-10.2918	1.15504e-22	1.30279e-20	40.6356
SFTA1P	-2.1073	4.75969	-12.6599	4.60469e-32	1.24751e-29	62.02
PEBP4	-2.09228	4.14423	-10.8507	8.85218e-25	1.29772e-22	45.4436
SLC22A31	-2.01917	6.12652	-11.5324	1.88834e-27	3.67482e-25	51.5187
CTSE	-1.99381	6.36847	-8.37192	5.71427e-16	2.69238e-14	25.4548
PIGR	-1.93201	6.97972	-7.80688	3.45449e-14	1.23815e-12	21.4283
GGTLC1	-1.89681	3.6473	-9.84664	4.97922e-21	4.67218e-19	36.9235
FOLR1	-1.82167	6.91451	-9.81102	6.69709e-21	6.17921e-19	36.6313
CYP2B7P	-1.81066	5.49334	-9.24371	6.82555e-19	4.82397e-17	32.0751
SUSD2	-1.78889	5.10407	-9.97938	1.63948e-21	1.59807e-19	38.0189
AGR3	-1.78456	6.45471	-8.92005	8.77165e-18	5.42651e-16	29.5616
SCGB1A1	-1.77598	5.86687	-5.25982	2.1407e-07	2.35026e-06	6.19107
SLC26A9	-1.73603	3.57165	-10.2535	1.60373e-22	1.7655e-20	40.3118
HOPX	-1.681	7.00851	-10.7578	2.00976e-24	2.81204e-22	44.6341
MSLN	-1.61616	6.54831	-5.7321	1.71572e-08	2.37001e-07	8.63026
AQP3	-1.60032	7.82662	-10.0264	1.10355e-21	1.09499e-19	38.4093
CACNA2D2	-1.58222	3.61072	-9.39358	2.04864e-19	1.54678e-17	33.2604
SFTA3	-1.5734	6.2638	-9.29607	4.4895e-19	3.26052e-17	32.4877
RNU6-403P	-1.56377	3.41624	-9.3752	2.37612e-19	1.78187e-17	33.1143
SFTA2	-1.53173	8.30816	-8.7752	2.69387e-17	1.54125e-15	28.4577
SLC34A2	-1.51418	9.27634	-8.46851	2.77547e-16	1.35988e-14	26.1645
RPS29P11	-1.49325	3.52454	-10.394	4.797e-23	5.65289e-21	41.5026
VSIG2	-1.49067	4.48253	-8.49052	2.35228e-16	1.16447e-14	26.3271
DMBT1	-1.474	3.94845	-6.64143	8.11087e-11	1.70251e-09	13.8361
ALOX15B	-1.4708	4.65004	-8.87151	1.27943e-17	7.6777e-16	29.1902
HP	-1.4706	3.64352	-6.6224	9.13172e-11	1.90378e-09	13.7205
GKN2	-1.46893	2.13569	-7.85695	2.42251e-14	8.89616e-13	21.7764
SCTR	-1.46825	3.36654	-8.44337	3.35144e-16	1.62196e-14	25.9791
AC079630.1	-1.4598	2.33064	-10.5589	1.14916e-23	1.46679e-21	42.9129
CD207	-1.44985	2.58286	-8.36435	6.04542e-16	2.83632e-14	25.3995
SLPI	-1.43796	9.22655	-7.88703	1.95584e-14	7.28897e-13	21.9863
CXCL17	-1.42609	8.24496	-8.47182	2.7073e-16	1.32884e-14	26.1889
AQP4	-1.42416	4.0185	-7.35414	7.90251e-13	2.3207e-11	18.3615
C4BPA	-1.41986	6.44533	-6.63453	8.46752e-11	1.77132e-09	13.7941
LMO3	-1.41679	5.39572	-8.69787	4.87785e-17	2.69859e-15	27.8738
FCER1A	-1.3947	2.71041	-9.62769	3.04536e-20	2.58542e-18	35.1385
SCNN1B	-1.38456	5.12589	-9.43982	1.40945e-19	1.091e-17	33.6288
ADH1B	-1.37396	3.56857	-7.64024	1.11153e-13	3.69626e-12	20.2826
CFAP221	-1.35686	3.01984	-10.7738	1.74645e-24	2.47494e-22	44.7727
ALPL	-1.34072	5.57281	-7.57411	1.75798e-13	5.68519e-12	19.8334
ATOH8	-1.33819	3.69234	-9.02149	3.96719e-18	2.55248e-16	30.3425
SELENBP1	-1.30761	6.77454	-10.5009	1.90246e-23	2.35224e-21	42.4153
C1orf116	-1.30134	5.9598	-8.7439	3.42715e-17	1.9308e-15	28.2209
IRX2	-1.29656	3.77951	-7.09101	4.56041e-12	1.19058e-10	16.6468
PLA2G1B	-1.28686	2.70564	-7.50373	2.85409e-13	8.91187e-12	19.3587
CAPN8	-1.27799	5.65339	-7.81041	3.36918e-14	1.20836e-12	21.4528
AQP1	-1.27746	7.36145	-7.84676	2.60437e-14	9.50087e-13	21.7054
LRRK2	-1.26913	3.7284	-8.12574	3.50289e-15	1.48124e-13	23.674
PPP1R1B	-1.2668	4.39903	-6.15357	1.55304e-09	2.6289e-08	10.9615
CRYM	-1.26655	4.07882	-6.77759	3.44607e-11	7.7021e-10	14.6712
CD1A	-1.25609	2.39021	-8.10201	4.16314e-15	1.74046e-13	23.5045
TMEM163	-1.23745	3.58186	-10.1802	2.99753e-22	3.19205e-20	39.6948
PLA2G10	-1.23583	2.71852	-8.46575	2.8335e-16	1.38709e-14	26.1441
MMP28	-1.23056	3.63641	-7.20043	2.21337e-12	6.02901e-11	17.3537
AL162511.1	-1.22914	2.17894	-9.67559	2.05397e-20	1.78208e-18	35.5266
ORM1	-1.22446	3.30809	-6.79267	3.13166e-11	7.06162e-10	14.7646
ABCA3	-1.20647	5.69534	-7.75147	5.10554e-14	1.78365e-12	21.0453
SLC22A3	-1.20423	3.87777	-8.45848	2.99242e-16	1.45714e-14	26.0905
MUC21	-1.19416	4.09926	-5.248	2.27504e-07	2.48198e-06	6.13241
GLB1L3	-1.19119	2.176	-6.14464	1.63646e-09	2.75715e-08	10.9106
IRX3	-1.18656	5.05521	-9.79264	7.80225e-21	7.17496e-19	36.4807
RNASE1	-1.1789	9.27986	-9.19964	9.69963e-19	6.72622e-17	31.7291
NKX2-1	-1.17629	6.69572	-7.28292	1.27624e-12	3.62276e-11	17.8924
LINC02257	-1.17184	2.41905	-8.53944	1.62691e-16	8.24919e-15	26.6895
MUC1	-1.17045	8.7137	-9.37643	2.35282e-19	1.76919e-17	33.124
AGER	-1.16979	5.16335	-6.20414	1.15331e-09	1.99315e-08	11.2508
WFDC2	-1.15764	9.46522	-8.08501	4.71015e-15	1.94997e-13	23.3833
SLC46A2	-1.1512	1.84764	-9.58575	4.29496e-20	3.56417e-18	34.7997
AQP5	-1.15059	4.44734	-4.33363	1.77342e-05	0.000130026	1.95968
C8orf34-AS1	-1.13488	2.43544	-8.14986	2.93788e-15	1.25674e-13	23.8467
SERPIND1	-1.12732	2.15974	-6.42344	3.10217e-10	5.8837e-09	12.5287
C20orf85	-1.12543	2.51938	-5.43724	8.47171e-08	1.01477e-06	7.08556
CLDN18	-1.12263	3.30491	-4.83819	1.74726e-06	1.60438e-05	4.1725
IGHD	-1.11143	5.09582	-4.70864	3.23327e-06	2.80088e-05	3.58306
WIF1	-1.09921	2.83741	-5.29844	1.75336e-07	1.95965e-06	6.38353
C5orf38	-1.0951	3.0074	-7.18575	2.44002e-12	6.61703e-11	17.2583
NPC2	-1.08911	9.5392	-11.1311	7.23908e-26	1.17673e-23	47.9163
PTCSC3	-1.08608	2.01975	-8.44683	3.26562e-16	1.58319e-14	26.0046
CLU	-1.08573	7.43379	-7.43459	4.57854e-13	1.39573e-11	18.8958
ST3GAL5	-1.08449	5.41948	-10.0159	1.20572e-21	1.18784e-19	38.3219
CXCL14	-1.08448	5.28309	-4.55163	6.68952e-06	5.41154e-05	2.88829
AC007207.2	-1.06545	1.70978	-8.26405	1.27094e-15	5.70461e-14	24.6696
CD1C	-1.06248	2.72266	-8.81631	1.9618e-17	1.14978e-15	28.7697
CTSH	-1.05751	8.57879	-8.87199	1.27468e-17	7.65748e-16	29.1939
LTF	-1.05349	4.94146	-4.98252	8.65822e-07	8.38484e-06	4.84631
HLF	-1.04279	2.604	-8.00028	8.69044e-15	3.45294e-13	22.7821
CLDN2	-1.04204	2.81698	-4.62562	4.76142e-06	3.96854e-05	3.21297
IRX5	-1.04045	3.57773	-8.18515	2.26971e-15	9.90588e-14	24.1001
AL365226.2	-1.03224	2.6619	-4.465	9.90288e-06	7.73587e-05	2.51421
ORM2	-1.02792	2.63307	-6.20333	1.15883e-09	2.00082e-08	11.2461
ROS1	-1.02742	3.8668	-6.49371	2.02104e-10	3.96706e-09	12.9461
BPIFB1	-1.0267	5.18592	-3.81175	0.000155173	0.000912738	-0.090472
LHFPL3-AS2	-1.02443	2.04954	-6.90997	1.4796e-11	3.51567e-10	15.4967
EPHX1	-1.02088	8.40758	-9.11126	1.95551e-18	1.30528e-16	31.0388
GJB1	-1.0208	3.38085	-5.06889	5.64099e-07	5.66642e-06	5.25813
ZNF750	-1.01963	2.77449	-7.80467	3.50892e-14	1.25684e-12	21.413
INMT	-1.01926	3.90318	-7.51486	2.64405e-13	8.29821e-12	19.4336
PCSK2	-1.01155	1.31461	-4.91851	1.18465e-06	1.11997e-05	4.54526
CHIA	-1.01144	1.75741	-6.67274	6.66972e-11	1.4238e-09	14.0269
ZNF385B	-1.00826	2.48308	-6.58707	1.13711e-10	2.33108e-09	13.5066
AHCYL2	-1.00063	5.76513	-8.17094	2.51839e-15	1.08995e-13	23.998
SPOCK1	1.00889	2.15638	7.4082	5.47924e-13	1.6449e-11	18.72
CTHRC1	1.01017	6.52671	7.99708	8.89287e-15	3.52323e-13	22.7595
RAD51	1.01038	2.71176	14.1326	2.11172e-38	1.01488e-35	76.4624
ASF1B	1.01059	4.26923	12.2833	1.6965e-30	4.07661e-28	58.4531
DKK1	1.01216	2.5575	5.06381	5.78578e-07	5.79815e-06	5.23376
XRCC2	1.01578	1.95174	14.8396	1.4993e-41	1.09543e-38	83.6403
CDCA2	1.01754	2.03827	13.6018	4.42381e-36	1.70975e-33	71.1724
WDR72	1.01808	1.46804	7.5403	2.21973e-13	7.06682e-12	19.6049
PSAT1	1.0245	4.43816	8.57145	1.27713e-16	6.57823e-15	26.9274
KIF3C	1.02478	2.98257	11.465	3.50344e-27	6.58599e-25	50.908
VIL1	1.02628	1.75238	5.6029	3.48391e-08	4.52098e-07	7.94454
TYMS	1.02786	4.86926	12.9761	2.13902e-33	6.56773e-31	65.0562
PLK4	1.0289	2.50672	14.9219	6.38519e-42	4.90649e-39	84.4855
ORC6	1.03004	3.19915	12.9865	1.93128e-33	5.9965e-31	65.1573
STIL	1.03182	2.61589	15.8703	3.05054e-46	4.81707e-43	94.3376
SHCBP1	1.03807	2.88245	13.7556	9.48506e-37	3.88311e-34	72.6964
TK1	1.03845	6.07475	10.5741	1.0061e-23	1.29314e-21	43.0441
WDHD1	1.04007	2.71263	15.4894	1.70236e-44	2.00183e-41	90.3547
E2F8	1.04296	2.44408	13.8136	5.30144e-37	2.18657e-34	73.2721
TIMELESS	1.04426	4.33676	15.9985	7.82063e-47	1.35072e-43	95.6857
PKP2	1.04436	2.74624	7.6723	8.89019e-14	2.996e-12	20.5016
GINS4	1.04451	2.18485	14.2651	5.48228e-39	2.83173e-36	77.7974
SLC15A1	1.04535	1.24497	9.16373	1.2904e-18	8.79385e-17	31.448
ATAD2	1.0464	4.1905	13.3112	7.93937e-35	2.79486e-32	68.315
GRIN2D	1.05159	1.60715	10.2128	2.27042e-22	2.45561e-20	39.9688
HOXA10	1.05308	1.34064	8.47525	2.63856e-16	1.29856e-14	26.2142
DSCC1	1.05363	2.87548	14.1349	2.06211e-38	9.99724e-36	76.4859
NEIL3	1.05468	1.98799	10.5169	1.65605e-23	2.06141e-21	42.5522
TMPRSS11E	1.05597	2.42339	5.59687	3.59969e-08	4.66029e-07	7.91291
LYPD3	1.05876	3.59498	6.83345	2.41578e-11	5.54235e-10	15.0179
RFC4	1.06208	4.7664	15.1794	4.3797e-43	3.96815e-40	87.1388
CENPI	1.06529	2.07546	15.0806	1.22708e-42	1.01221e-39	86.1186
LINC01980	1.066	0.858858	7.65872	9.77319e-14	3.27957e-12	20.4088
DTL	1.06603	3.01176	14.1614	1.575e-38	7.77207e-36	76.7527
AUNIP	1.06674	1.82059	16.2075	8.45143e-48	1.94622e-44	97.8893
ABCC2	1.06918	1.3855	6.35202	4.7771e-10	8.78897e-09	12.1083
OIP5	1.07095	2.32797	14.4824	5.9467e-40	3.65905e-37	79.9964
CENPU	1.0714	4.02847	12.7329	2.27376e-32	6.28332e-30	62.718
FANCI	1.07325	3.83007	15.4376	2.93197e-44	3.30702e-41	89.8163
CENPE	1.0762	1.92799	15.2702	1.69641e-43	1.70467e-40	88.078
APOBEC3B	1.0773	2.98673	9.12157	1.80232e-18	1.21033e-16	31.1191
CDC25C	1.07806	2.32124	13.958	1.2367e-37	5.4594e-35	74.7128
LMNB1	1.0812	4.79688	14.0955	3.07465e-38	1.42798e-35	76.0905
FAM111B	1.08259	2.8997	12.4956	2.23595e-31	5.79803e-29	60.4571
CDT1	1.08329	3.42059	12.2457	2.42222e-30	5.77032e-28	58.1009
SULF1	1.08412	5.57461	8.29856	9.84979e-16	4.51766e-14	24.9199
KIF15	1.08552	2.11063	15.5709	7.21691e-45	8.67097e-42	91.2045
ARNTL2	1.08715	3.10487	9.69709	1.72032e-20	1.51641e-18	35.7013
BRCA1	1.09101	2.52866	16.1514	1.5367e-47	3.3972e-44	97.2972
MTFR2	1.09191	2.38968	15.4443	2.7319e-44	3.14555e-41	89.8863
KIF14	1.09234	1.85167	14.7648	3.24818e-41	2.27241e-38	82.8748
KCNMB2-AS1	1.09356	1.72531	7.53437	2.31216e-13	7.32732e-12	19.565
IQGAP3	1.09442	3.42686	11.8125	1.4183e-28	2.96919e-26	54.0773
EGLN3	1.09519	4.90493	7.36738	7.2259e-13	2.13791e-11	18.4491
GREM1	1.09596	2.68695	8.06828	5.31743e-15	2.18501e-13	23.2643
PEG10	1.09932	3.9643	5.54217	4.83774e-08	6.1121e-07	7.62702
DDIAS	1.10013	2.19835	15.8585	3.45701e-46	5.30728e-43	94.2138
PKMYT1	1.10161	3.41781	12.1497	6.01413e-30	1.39659e-27	57.2017
MAD2L1	1.10253	2.93895	13.3904	3.62473e-35	1.31797e-32	69.0909
PHGDH	1.10258	3.90864	8.30314	9.5218e-16	4.38177e-14	24.9532
SKA3	1.11367	2.48766	14.2927	4.13842e-39	2.19925e-36	78.0757
HOXB9	1.11455	1.48318	6.24093	9.27673e-10	1.6323e-08	11.4625
NCAPG2	1.11651	3.69224	15.7737	8.47984e-46	1.23333e-42	93.3251
MAGEC2	1.11718	0.693258	8.23561	1.56711e-15	6.95671e-14	24.4638
SLC16A1	1.1196	3.2009	9.55541	5.5043e-20	4.52696e-18	34.5552
ARHGAP11A	1.12378	2.76507	14.7314	4.58775e-41	3.16945e-38	82.5329
SPC25	1.12787	2.9696	14.4491	8.3666e-40	4.9721e-37	79.6584
CYCSP6	1.12807	0.890492	9.6094	3.5384e-20	2.97204e-18	34.9906
SEMA3A	1.1296	2.30338	9.1788	1.14483e-18	7.86968e-17	31.5659
FGB	1.13015	2.99205	3.44563	0.000617618	0.00309891	-1.38061
SGO1	1.13408	2.14153	15.6721	2.48185e-45	3.18993e-42	92.2616
ECT2	1.1372	4.58835	13.9351	1.55847e-37	6.78216e-35	74.4839
KPNA2	1.13757	6.45069	14.1774	1.33874e-38	6.66574e-36	76.9136
HMMR	1.13842	3.28937	12.7431	2.06169e-32	5.72591e-30	62.8148
GGH	1.13894	4.79405	9.81199	6.64369e-21	6.14019e-19	36.6392
CENPW	1.13926	4.22008	13.1993	2.39601e-34	8.17426e-32	67.2221
POPDC3	1.14073	1.25361	8.69137	5.12664e-17	2.81369e-15	27.8249
MCM4	1.14153	5.44333	14.2874	4.36951e-39	2.29995e-36	78.022
SKA1	1.14638	2.23228	14.1209	2.37713e-38	1.13258e-35	76.3452
UHRF1	1.15002	2.98286	13.524	9.60635e-36	3.58732e-33	70.405
RACGAP1	1.15666	4.51502	15.7146	1.58383e-45	2.135e-42	92.7064
PBK	1.15851	3.0774	10.9695	3.07846e-25	4.68707e-23	46.4866
GINS1	1.15973	3.32834	13.8343	4.30254e-37	1.80146e-34	73.4788
HMGA1	1.1618	7.82668	13.0266	1.30518e-33	4.14568e-31	65.5449
KIF20A	1.1643	3.65923	13.5609	6.65404e-36	2.53625e-33	70.7684
CHEK1	1.1807	3.16307	16.2882	3.56949e-48	9.78056e-45	98.743
RPL39L	1.18243	5.07411	10.3026	1.05331e-22	1.19292e-20	40.7266
PLOD2	1.18352	5.64286	10.0046	1.32633e-21	1.30202e-19	38.2279
NUSAP1	1.18389	4.64951	14.2267	8.1087e-39	4.11148e-36	77.4099
ASPM	1.18765	2.22324	14.4806	6.05814e-40	3.67935e-37	79.978
CLDN6	1.18893	1.90654	5.4368	8.49111e-08	1.01665e-06	7.08335
ORC1	1.1903	2.43435	16.0581	4.14834e-47	8.06076e-44	96.3136
CCNB1	1.19916	5.15706	13.1365	4.44276e-34	1.47031e-31	66.6111
CCNE1	1.2025	3.04081	12.4952	2.24502e-31	5.79803e-29	60.4531
QPCT	1.20547	4.87258	7.31504	1.02857e-12	2.96079e-11	18.1035
CDCA3	1.21108	3.04126	14.6582	9.75868e-41	6.56183e-38	81.7857
MCM10	1.21655	2.21258	14.5416	3.23828e-40	2.08108e-37	80.5981
ZWINT	1.21789	5.01502	14.9423	5.16818e-42	4.0805e-39	84.6948
FAM133A	1.22174	0.93414	8.99618	4.83849e-18	3.07019e-16	30.1471
ADGRF4	1.22281	1.79689	10.0953	6.16499e-22	6.32146e-20	38.9835
LY6K	1.22548	2.18788	7.2016	2.19625e-12	5.98537e-11	17.3613
RAD54L	1.22807	2.28267	16.2741	4.14787e-48	9.96715e-45	98.5942
CIP2A	1.23019	2.44613	17.3671	3.15847e-53	3.49125e-49	110.267
CLSPN	1.23194	1.99254	16.6374	8.44744e-50	4.66873e-46	102.451
PRC1	1.23876	4.04754	15.163	5.19897e-43	4.5609e-40	86.969
CDK1	1.2435	5.02496	12.947	2.84069e-33	8.48645e-31	64.7755
GCLC	1.24853	5.16198	8.62007	8.83011e-17	4.68802e-15	27.2902
MAGEA4	1.25228	0.699835	7.42746	4.80664e-13	1.45564e-11	18.8482
AURKA	1.25657	4.32849	13.6569	2.54968e-36	1.02113e-33	71.7177
DSP	1.26288	5.9564	9.3105	3.99875e-19	2.92332e-17	32.6017
KIF11	1.27048	3.52141	16.0667	3.78947e-47	7.75691e-44	96.4032
COL11A1	1.27259	3.0979	6.89501	1.62901e-11	3.8541e-10	15.4027
TUBB2B	1.28085	2.51352	7.42976	4.73178e-13	1.4369e-11	18.8636
CCNB2	1.28229	3.97235	14.5252	3.83213e-40	2.43441e-37	80.4314
MCM2	1.28383	4.93543	16.5259	2.79907e-49	1.18999e-45	101.264
RAD51AP1	1.29156	3.21222	16.625	9.65181e-50	4.84942e-46	102.319
NUF2	1.29804	3.59484	12.8624	6.47808e-33	1.86474e-30	63.96
SERPINB5	1.29826	1.99127	6.86209	2.01182e-11	4.68758e-10	15.1966
CDKN3	1.29923	3.96141	12.9344	3.21241e-33	9.54535e-31	64.6539
PLK1	1.29976	3.67123	15.155	5.64997e-43	4.8791e-40	86.8866
PIMREG	1.30025	2.76819	14.3332	2.73866e-39	1.49862e-36	78.4844
GNG4	1.30453	1.44624	9.67757	2.02073e-20	1.756e-18	35.5427
DEPDC1B	1.30602	2.70209	15.1844	4.15883e-43	3.83084e-40	87.19
CKAP2L	1.31159	2.43013	16.8418	9.34446e-51	6.45562e-47	104.632
GTSE1	1.31676	2.93528	16.2826	3.7879e-48	9.78056e-45	98.6841
SPAG5	1.31954	3.96536	15.3352	8.58212e-44	8.78364e-41	88.7527
ESPL1	1.32387	2.36809	16.3903	1.19683e-48	4.13414e-45	99.8252
EXO1	1.32817	2.56795	16.0222	6.07765e-47	1.11966e-43	95.9354
MAGEA12	1.33512	0.976841	7.82227	3.09812e-14	1.11549e-12	21.5351
CDC45	1.33523	3.34082	14.8915	8.75956e-42	6.63182e-39	84.1724
CENPF	1.34294	3.34157	13.9724	1.06951e-37	4.76689e-35	74.8566
CDCA8	1.34298	3.99254	16.0099	6.92828e-47	1.2352e-43	95.8057
DEPDC1	1.34438	2.20739	16.2901	3.49594e-48	9.78056e-45	98.7636
KLK6	1.3467	1.49975	7.43271	4.63776e-13	1.41199e-11	18.8833
MMP12	1.34949	4.21282	7.38606	6.36733e-13	1.89504e-11	18.5729
BUB1B	1.35186	3.09247	16.0563	4.22961e-47	8.06076e-44	96.2944
NCAPG	1.35284	2.76292	15.7464	1.13271e-45	1.6052e-42	93.0384
FAM83D	1.35395	3.57103	14.8666	1.13331e-41	8.46427e-39	83.9174
PFN2	1.35608	6.12477	11.5745	1.28272e-27	2.5319e-25	51.9009
NDC80	1.35795	3.42891	14.9716	3.81253e-42	3.05378e-39	84.9961
CCNA2	1.36875	3.81351	15.3403	8.1417e-44	8.4901e-41	88.8049
CEP55	1.36933	4.05794	14.3093	3.4942e-39	1.87493e-36	78.2433
TRIP13	1.38189	3.90853	13.9574	1.24463e-37	5.4594e-35	74.7065
CTSV	1.39987	1.97438	14.0226	6.43509e-38	2.9152e-35	75.3594
CDC6	1.40043	3.20747	15.9926	8.33235e-47	1.39549e-43	95.6229
CSAG1	1.41477	1.10782	7.88485	1.98641e-14	7.39293e-13	21.971
BUB1	1.42717	3.74135	16.28	3.89325e-48	9.78056e-45	98.657
TROAP	1.42732	3.25285	14.4364	9.53238e-40	5.60463e-37	79.5292
KIF18B	1.42982	2.69904	15.7438	1.16355e-45	1.60768e-42	93.0118
NEK2	1.43293	3.76637	14.5238	3.89055e-40	2.44344e-37	80.4164
KIF23	1.43419	3.35729	17.2693	9.13894e-53	8.41818e-49	109.215
MELK	1.44115	3.55369	14.3685	1.909e-39	1.0766e-36	78.8417
MKI67	1.44565	3.5595	15.1403	6.5889e-43	5.60239e-40	86.7344
KIFC1	1.44701	4.17783	15.8224	5.06798e-46	7.57019e-43	93.8349
UCHL1	1.45465	4.90092	7.019	7.30403e-12	1.82248e-10	16.1864
HJURP	1.45485	3.25739	15.1923	3.8291e-43	3.64874e-40	87.2718
AURKB	1.45642	4.3238	14.3933	1.48043e-39	8.52296e-37	79.0934
IGF2BP1	1.45683	0.812643	13.3162	7.55979e-35	2.69558e-32	68.3635
CDCA5	1.45859	4.0731	15.6826	2.22072e-45	2.92226e-42	92.3717
BIRC5	1.46491	4.69069	13.3521	5.29595e-35	1.91305e-32	68.7157
TTK	1.46727	2.59046	17.8459	1.70211e-55	4.70362e-51	115.441
KIF1A	1.4701	1.41711	8.27691	1.15593e-15	5.24083e-14	24.7627
PRR11	1.47573	3.85545	16.3719	1.45732e-48	4.73783e-45	99.6302
NCAPH	1.47749	3.27168	17.5737	3.32988e-54	4.60089e-50	112.496
CENPA	1.47952	3.08587	15.4054	4.11077e-44	4.45478e-41	89.4816
DLGAP5	1.48039	3.42232	15.5745	6.94834e-45	8.5338e-42	91.2421
RRM2	1.5031	4.70693	15.0928	1.08074e-42	9.05006e-40	86.2444
AC099850.3	1.50379	3.53751	16.3054	2.97043e-48	9.12054e-45	98.9249
CASC9	1.5086	1.86493	9.21882	8.32506e-19	5.82417e-17	31.8796
SLC2A1	1.51745	6.19405	12.536	1.51821e-31	4.03407e-29	60.84
CDC20	1.52913	5.08987	14.5569	2.76732e-40	1.79935e-37	80.7537
H19	1.5401	3.47646	7.09369	4.48098e-12	1.17094e-10	16.664
KIF2C	1.57008	3.88334	16.737	2.89137e-50	1.77556e-46	103.513
KIF4A	1.58131	3.17888	17.5978	2.56124e-54	4.60089e-50	112.756
HMGA2	1.60277	1.23429	11.5904	1.10783e-27	2.21038e-25	52.0457
FOXM1	1.63116	4.17477	16.4569	5.86834e-49	2.16221e-45	100.531
IGF2BP2	1.63249	3.63939	14.6764	8.0873e-41	5.51814e-38	81.9717
ANLN	1.64931	4.08968	15.8734	2.95036e-46	4.7959e-43	94.3707
TOP2A	1.6565	5.21326	16.1022	2.59419e-47	5.51445e-44	96.7785
UBE2C	1.66747	5.97012	12.89	4.9496e-33	1.43976e-30	64.2262
TPX2	1.7707	4.74381	17.061	8.74258e-52	6.90264e-48	106.978
MAGEA6	1.83268	1.22195	9.67942	1.99009e-20	1.73483e-18	35.5578
MYBL2	1.84668	4.89049	14.9979	2.90088e-42	2.35774e-39	85.2667
PRAME	1.96296	2.42758	9.49539	8.97718e-20	7.15946e-18	34.0732
MAGEA3	2.01274	1.37097	10.1619	3.50315e-22	3.69489e-20	39.541
IGF2BP3	2.91746	2.16387	33.0233	8.30021e-128	4.58736e-123	280.014
